# Supplementary material
Source: PubMed Central journal article supplement (PMC9633323)

## SUPPLEMENTAL MATERIALS

| <b>TABLES</b>                                                                                                                                                                                                                                                                         | <b>PAGE</b> |
|---------------------------------------------------------------------------------------------------------------------------------------------------------------------------------------------------------------------------------------------------------------------------------------|-------------|
| <b>Table S1.</b> Association between suspected COVID-19 status and confirmed COVID-19 test results after hospital admission at 20 COVERED U.S. academic medical center emergency departments, May-December 2020                                                                       | 2           |
| <b>Table S2.</b> Number of intubation attempts, stratified by known or suspected COVID-19 status, at 20 COVERED U.S. academic medical center emergency departments, May-December 2020                                                                                                 | 3           |
| <b>Table S3.</b> Characteristics of patients who died without being intubated at 20 COVERED U.S. academic medical center emergency departments, May-December 2020                                                                                                                     | 4           |
| <b>Table S4.</b> Multivariable regression model beta coefficients for outcomes of first pass success and adverse events for patients intubated at 20 COVERED U.S. academic medical center emergency departments, May-December 2020                                                    | 5           |
| <br><b>FIGURES</b>                                                                                                                                                                                                                                                                    |             |
| <b>Figure S1.</b> Number of intubations included from each site over the study period at 20 COVERED U.S. academic medical center emergency departments, May-December 2020                                                                                                             | 7           |
| <b>Figure S2.</b> Number of endotracheal intubation (ETI) procedures performed by month during the study period at 20 COVERED U.S. academic medical center emergency departments, May-December 2020                                                                                   | 8           |
| <b>Figure S3.</b> Percentage of total intubations without components of CDC guideline-adherent full-barrier airborne precautions among intubations of patients who tested positive for SARS-CoV-2 at 20 COVERED U.S. academic medical center emergency departments, May-December 2020 | 9           |
| <b>Figure S4.</b> Time spent in the patient care room for endotracheal intubation, stratified by COVID-19 known or suspected status at the time of intubation, at 20 COVERED U.S. academic medical center emergency departments, May-December 2020                                    | 10          |

**SUPPLEMENTAL TABLES**

**Supplemental Table S1. Association between suspected COVID-19 status and confirmed COVID-19 test results after hospital admission at 20 COVERED U.S. academic medical center emergency departments, May-December 2020.** Clinical gestalt predicted COVID-19 status (among those with confirmed inpatient test results) with sensitivity 54% (95% CI 37–77%), specificity 87% (95% CI 84–90%), positive likelihood ratio of 4.0 (95% CI 2.6–6.1), and negative likelihood ratio of 0.5 (95% CI 0.4–0.8).

|                                       |                        | SARS-CoV-2 Test Result |                |            |
|---------------------------------------|------------------------|------------------------|----------------|------------|
|                                       |                        | SARS-CoV-2 (+)         | SARS-CoV-2 (-) | Not Tested |
|                                       |                        | n (%)                  |                |            |
| COVID-19 Status at Time of Intubation | COVID-19 (+)           | 111 (85.3)             | 16 (12.3)      | 3 (2.3)    |
|                                       | COVID-19 Suspected     | 66 (15.2)              | 339 (77.9)     | 30 (6.9)   |
|                                       | COVID-19 Not Suspected | 57 (2.2)               | 2,189 (83.9)   | 362 (13.9) |
|                                       | COVID-19 (-)           | 3 (1.2)                | 255 (97.3)     | 4 (1.5)    |

**Supplemental Table S2. Number of intubation attempts, stratified by known or suspected COVID-19 status, at 20 COVERED U.S. academic medical center emergency departments, May-December 2020.** Each cell represents a mutually exclusive stratum of patients, based on knowledge available at the time of intubation. Patients who were never successfully intubated are included in the last row of the table (all patients for whom cricothyroidotomy was performed are included in “unsuccessful” intubations).

|                            | <b>COVID-19<br/>Confirmed or<br/>Suspected<br/>(n=564)</b> | <b>No COVID-19<br/>Confirmed or<br/>Suspected<br/>(n=2,868)</b> | <b>Proportion<br/>Difference<br/>(95% CI)<sup>1</sup></b> |
|----------------------------|------------------------------------------------------------|-----------------------------------------------------------------|-----------------------------------------------------------|
| <b>Intubation Attempts</b> | <b>n (%)</b>                                               |                                                                 |                                                           |
| 1                          | 496 (87.9)                                                 | 2506 (87.4)                                                     | 0.6 ([-2.4]-3.6)                                          |
| 2                          | 56 (9.9)                                                   | 257 (9.0)                                                       | 1.2 ([-1.5]-3.8)                                          |
| 3                          | 7 (1.2)                                                    | 59 (2.1)                                                        | -0.8 ([-2.0]-0.3) <sup>2</sup>                            |
| 4 or more                  | 4 (0.7)                                                    | 33 (1.2)                                                        | -0.5 ([-1.5]-0.4) <sup>2</sup>                            |
| Unsuccessful               | 1 (0.2)                                                    | 13 (0.5)                                                        | -0.3 ([-0.8]-0.3) <sup>2</sup>                            |

<sup>1</sup> Difference is calculated using univariate generalized linear mixed models with random effects for site and person performing the procedure. Some values may have a difference calculated that differs from the arithmetic difference because of the effects of modeling and rounding.

<sup>2</sup> Low counts affected estimability. Unadjusted proportions and differences are calculated instead using a score test.

**Supplemental Table S3. Characteristics of patients who died without being intubated at 20 COVERED U.S. academic medical center emergency departments, May-December 2020.**

| Age | Sex  | Indication for Intubation | Timing of Cardiac Arrest | Predicted Airway Difficulty | Suspected COVID-19 Status | SARS-CoV-2 Test | Number of Intubation Attempts | Rapid Sequence Induction | Preoxygenation | Passive Nasal Oxygenation | Intubation Medications | First-Attempt Equipment | Cardiac Arrest During Procedure | Intubation Adjuncts | Primary Intubator |
|-----|------|---------------------------|--------------------------|-----------------------------|---------------------------|-----------------|-------------------------------|--------------------------|----------------|---------------------------|------------------------|-------------------------|---------------------------------|---------------------|-------------------|
| 61  | Male | Cardiac Arrest            | Prior to ED Arrival      | Expected to be Difficult    | NOT Suspected             | Negative        | 3                             | No                       | Bag-Mask       | No                        | None                   | Video Laryngoscopy      | Yes                             | None                | Resident, Year 2  |
| 29  | Male | Cardiac Arrest            | Prior to ED Arrival      | Expected to be Difficult    | NOT Suspected             | Negative        | 1                             | No                       | Bag-Mask       | Yes                       | None                   | Video Laryngoscopy      | Yes                             | None                | Resident, Year 1  |

**Supplemental Table S4. Multivariable regression model beta coefficients for outcomes of first pass success and adverse events for patients intubated at 20 COVERED U.S. academic medical center emergency departments, May-December 2020.** On the left side of this table, 3 models are presented for the outcome of first-pass success: one for the unadjusted estimate, one for the estimate adjusted for patient factors, and one for the model adjusted for patient and procedure factors. On the right side of the table, the same three models are presented for the outcome of adverse events. Interaction terms are noted as coefficients in the model, which is why stratified analyses are reported in Figure 5. All coefficients are reported as beta coefficients with 95% confidence intervals.

| Covariates                                                                    | First Pass Success  |                                       |                                                     | Adverse Events      |                                       |                                                     |
|-------------------------------------------------------------------------------|---------------------|---------------------------------------|-----------------------------------------------------|---------------------|---------------------------------------|-----------------------------------------------------|
|                                                                               | Unadjusted (95% CI) | Adjusted for Patient Factors (95% CI) | Adjusted for Patient and Procedure Factors (95% CI) | Unadjusted (95% CI) | Adjusted for Patient Factors (95% CI) | Adjusted for Patient and Procedure Factors (95% CI) |
| Known or Predicted COVID-19 Status                                            | 0.05 ([-0.24]-0.34) | 0.18 ([-0.13]-0.49)                   | 0.13 ([-0.18]-0.44)                                 | 0.93 (0.71-1.16)    | 0.84 (0.55-1.14)                      | 0.87 (0.57-1.17)                                    |
| Expected Airway Difficulty                                                    | —                   | -1.11 ([-1.33] - [-0.89])             | -1.26 ([-1.52]- [-1.01])                            | —                   | 0.98 (0.76-1.20)                      | 0.98 (0.76-1.20)                                    |
| Interaction (Known or Predicted COVID-19 Status x Expected Airway Difficulty) | —                   | —                                     | —                                                   | —                   | -0.68 ([-1.13] - [-0.22])             | -0.69 ([-1.15] - [-0.23])                           |
| Acuity: Semi-Elective                                                         | —                   | -0.07 ([-1.09]-0.94)                  | -0.12 ([-1.15]-0.90)                                | —                   | 0.11 ([-0.72]-0.93)                   | 0.10 ([-0.72]-0.92)                                 |
| Acuity: Emergent                                                              | —                   | -0.48 ([-1.46]-0.50)                  | -0.51 ([-1.50]-0.48)                                | —                   | 0.42 ([-0.38]-1.22)                   | 0.39 ([-0.41]- [1.19])                              |
| Reason for Intubation: Mental Status Changes                                  | —                   | 0.17 ([-0.08]-0.42)                   | 0.16 ([-0.08]-0.41)                                 | —                   | -1.06 ([-1.27] - [-0.85])             | -1.06 ([-1.27] - [-0.85])                           |

|                                                               |   |                      |                           |   |                           |                           |
|---------------------------------------------------------------|---|----------------------|---------------------------|---|---------------------------|---------------------------|
| Reason for Intubation: Airway Compromise                      | — | 0.04 ([-0.47]-0.54)  | 0.03 ([-0.48]-0.53)       | — | -1.02 ([-1.50] - [-0.54]) | -1.01 ([-1.50] - [-0.53]) |
| Reason for Intubation: Cardiac Arrest                         | — | -0.01 ([-0.44]-0.42) | 0.04 ([-0.40]-0.48)       | — | -0.92 ([-1.32] - [-0.52]) | -0.98 ([-1.38] - [-0.57]) |
| Reason for Intubation: Polytrauma                             | — | 0.00 ([-0.84]-0.85)  | 0.00 ([-0.86]-0.85)       | — | -1.44 ([-2.29] - [-0.59]) | -1.44 ([-2.29] - [-0.59]) |
| Passive Oxygenation                                           | — | —                    | 0.01 ([-0.23]-0.24)       | — | —                         | -0.19 ([-0.40]-[0.02])    |
| Video Laryngoscopy                                            | — | —                    | -1.01 ([-1.36] - [-0.66]) | — | —                         | 0.14 ([-0.12]-0.41)       |
| Interaction (Video Laryngoscopy x Expected Airway Difficulty) | — | —                    | 0.60 (0.07-1.13)          | — | —                         | —                         |

## SUPPLEMENTAL FIGURE LEGENDS

**Supplemental Figure S1. Number of intubations included from each site during the COVID-19 pandemic at 20 COVERED U.S. academic medical center emergency departments, May-December 2020.** Each letter indicates one of the sites that participated in the project.

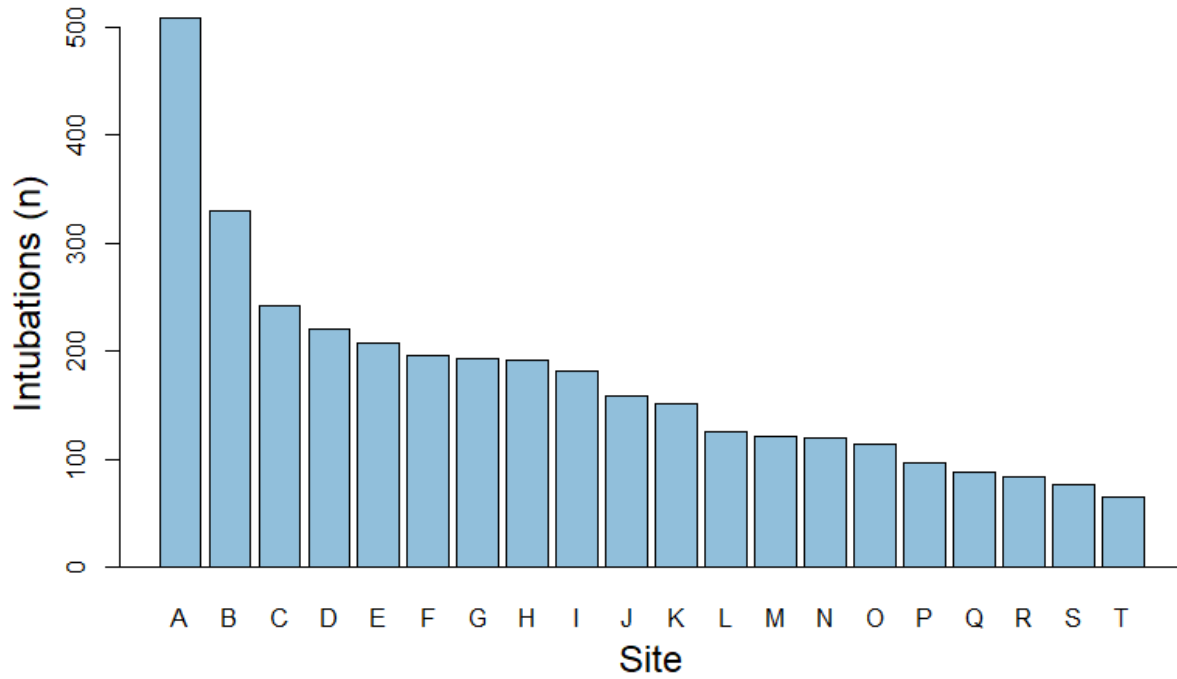

**Supplemental Figure S2. Number of endotracheal intubation (ETI) procedures performed by month during the COVID-19 pandemic at 20 COVERED U.S. academic medical center emergency departments, May-December 2020.**

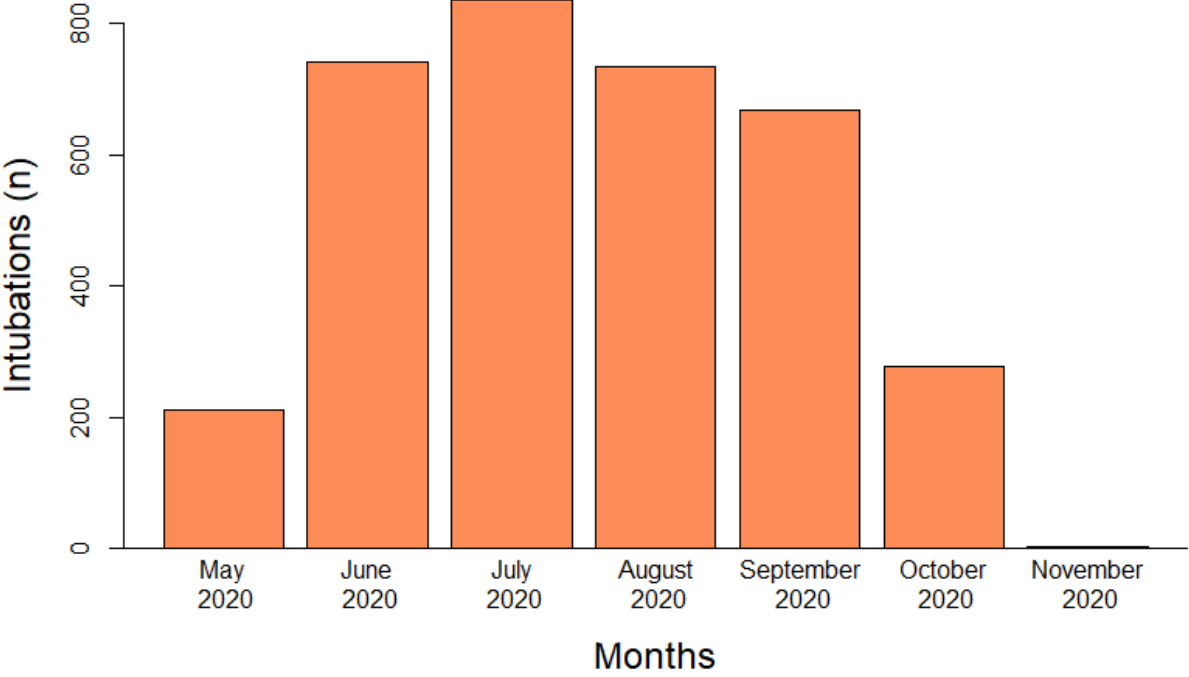



**Supplemental Figure S3. Percentage of total intubations without components of CDC guideline-adherent full-barrier airborne precautions among intubations of patients who tested positive for SARS-CoV-2 at 20 COVERED U.S. academic medical center emergency departments, May-December 2020.** The total number of intubations without components of CDC guideline-adherent full-barrier airborne precautions among intubations of patients who tested positive for SARS-CoV-2 is n=88.

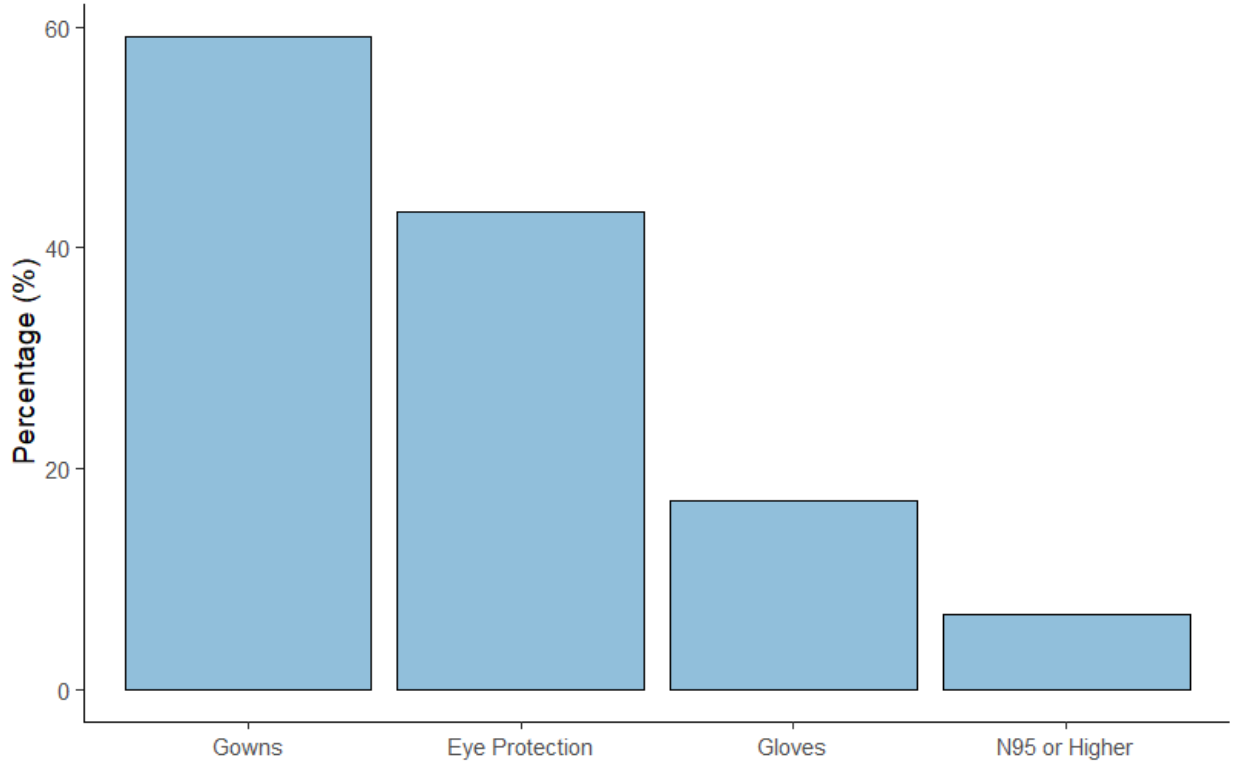

**Supplemental Figure S4. Time spent in the patient care room for endotracheal intubation, stratified by COVID-19 known or suspected status at the time of intubation at 20 COVERED U.S. academic medical center emergency departments, May-December 2020.**

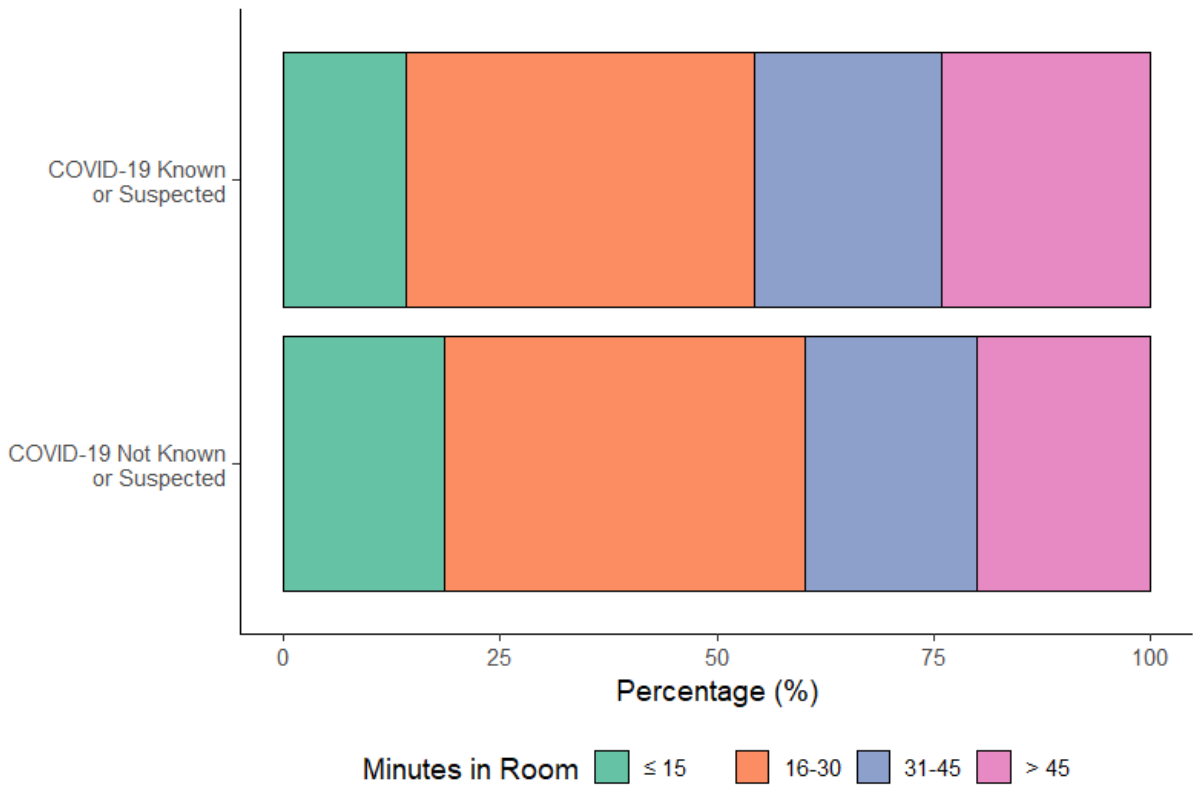

Supplement: mmc1.pdf [file mmc1.pdf]
